# Supplementary material for: Coral reef fishes exhibit beneficial phenotypes inside marine protected areas
Source: PLoS One. 2018 Feb 22;13(2):e0193426. doi: 10.1371/journal.pone.0193426 (PMC5823445; doi:10.1371/journal.pone.0193426)
Supplement: S1 Dataset — In the tables, “F” represents females, “M” males, and “U” unknown gender. For gonad stages, “1” represents immature, “2” mature, and “3” mature, engorged and preparing to spawn. The term “STG” refers to individuals that had gonads damaged during collection, making sexing and staging unreliable. (XLSX) [file pone.0193426.s001.xlsx]

## Sheet: Acanthurus nigrofuscus
Fished Reefs					Bani MPA					San Salvador MPA					Taklobo Farm MPA
Age (Years)	Standard Length (mm)	Sex	Gonad Stage		Age (Years)	Standard Length (mm)	Sex	Gonad Stage		Age (Years)	Standard Length (mm)	Sex	Gonad Stage		Age (Years)	Standard Length (mm)	Sex	Gonad Stage
<1	47	U	1		<1	37	U	1		<1	41	M	1		<1	40	U	1
<1	45	U	1		<1	36	U	1		<1	38	M	1		<1	38	M	1
<1	35	U	1		<1	41	M	1		<1	35	M	1		<1	34	U	1
<1	42	U	1		<1	41	U	1		<1	39	U	1		<1	34	U	1
<1	35	U	1		<1	38	M	1		<1	36	U	1		<1	35	M	1
<1	47	U	1		<1	37	U	1		<1	38	U	1		<1	53	M	1
<1	45	U	1		<1	40	U	1		<1	44	M	1		<1	39	U	STG
<1	44	U	1		<1	39	U	1		<1	44	U	STG		<1	39	U	1
<1	44	U	1		<1	36	U	1		1	56	M	1		<1	38	U	1
<1	43	U	1		<1	38	U	1		1	55	M	1		1	74	F	3
<1	40	U	1		1	57	F	2		1	58	F	2		1	53	U	1
<1	36	U	1		1	54	U	STG		1	55	F	1		1	55	M	1
<1	40	U	1		1	49	F	1		1	53	F	1		1	47	M	1
<1	35	U	1		1	55	U	STG		1	57	M	1		1	55	M	1
<1	36	U	1		1	57	M	1		1	52	M	1		1	68	F	2
<1	37	U	1		1	55	M	1		2	66	F	3		1	59	F	1
1	53	U	STG		1	64	F	3		2	66	F	3		2	72	F	3
1	59	U	STG		1	66	U	STG		2	65	F	3		2	65	M	2
1	59	F	3		2	64	F	3		3	87	M	2		2	60	M	1
1	62	F	3		2	75	M	3		3	70	F	2		2	72	F	3
1	57	U	STG		2	69	F	3		3	78	F	3		2	74	M	3
1	56	M	1		2	68	F	3		3	75	F	3		2	69	F	3
1	59	F	1		2	74	F	3		4	72	F	3		2	63	M	1
1	59	F	1		2	70	F	3		4	96	M	2		4	94	M	3
1	57	U	STG		3	79	M	3		4	91	F	2		4	74	F	2
1	55	M	1		3	64	F	3		5	73	U	STG		5	84	M	3
1	47	U	STG		3	75	M	2		5	78	F	3		5	82	M	3
1	49	M	1		4	71	M	3		6	105	F	3		7	86	F	3
1	46	U	1		4	80	M	3		6	98	M	2		9	83	F	3
1	44	U	1		4	75	M	2		6	80	M	2		10	93	F	3
2	64	F	3		4	77	F	3		6	83	M	3		10	83	M	1
2	68	F	3		5	85	M	3		7	90	M	3		11	80	F	3
2	64	M	2		5	77	F	3		7	79	F	2		12	89	F	2
2	64	M	3		5	83	M	3		9	91	M	3		13	90	U	STG
2	75	M	3		6	92	M	3		14	94	M	3
2	76	M	3		8	82	M	2
2	63	F	3		8	85	M	3
2	64	F	2		9	79	F	2
3	67	F	3		10	84	M	2
3	75	F	3
3	70	M	3
3	65	F	3
3	67	F	3
3	60	F	3
3	72	M	2
3	79	M	2
3	81	M	2
3	74	M	2
3	76	F	3
3	70	F	3
3	71	F	3
4	70	F	3
4	70	F	3
4	66	F	3
4	75	M	3
4	69	F	3
4	67	F	3
4	80	M	2
4	72	F	3
4	75	U	STG
4	70	F	3
4	71	F	3
5	77	F	3
5	74	M	3
5	68	F	3
5	87	M	3
5	82	M	3
5	83	F	3
5	88	F	3
5	80	M	3
5	64	F	3
5	76	M	3
5	85	M	3
5	80	M	3
6	81	M	3
6	78	M	3
6	76	F	3
6	72	M	3
6	84	M	3
6	80	M	3
6	76	F	3
6	69	F	3
6	81	M	3
6	78	F	3
6	79	M	3
6	88	M	3
7	84	M	3
7	85	F	3
7	79	U	STG
7	77	M	3
9	88	M	3
10	76	F	3
10	78	F	3
10	83	M	3
10	85	F	3
10	83	F	3
11	97	M	3
12	78	M	2

## Sheet: Ctenochaetus striatus
Fished Reefs					Bani MPA					San Salvador MPA					Taklobo Farm MPA
Age (Years)	Standard Length (mm)	Sex	Gonad Stage		Age (Years)	Standard Length (mm)	Sex	Gonad Stage		Age (Years)	Standard Length (mm)	Sex	Gonad Stage		Age (Years)	Standard Length (mm)	Sex	Gonad Stage
<1	31	U	1		<1	60	M	1		<1	47	M	1		<1	37	U	1
<1	38	U	1		<1	51	M	1		1	68	M	1		1	81	M	2
<1	36	U	1		<1	46	M	1		1	68	M	1		1	65	M	1
<1	37	U	1		<1	29	M	1		1	61	M	1		1	63	M	1
<1	43	M	1		<1	31	U	1		1	75	M	2		1	63	M	1
<1	40	M	1		1	68	F	3		1	70	F	2		1	60	F	1
<1	35	U	1		1	77	M	1		1	66	M	2		1	77	M	1
1	82	M	1		1	67	M	1		1	69	F	2		1	67	M	1
1	70	U	STG		1	74	M	1		1	69	M	1		1	55	M	1
1	76	M	1		1	76	M	2		1	62	M	1		1	77	M	1
1	84	M	1		1	77	M	2		2	86	M	2		1	59	M	1
1	77	M	1		1	70	M	1		2	84	M	3		1	63	M	1
1	85	U	STG		1	70	F	2		2	69	F	3		1	71	M	1
1	61	M	1		1	85	M	2		2	68	F	3		1	62	F	1
1	72	F	2		1	88	F	2		2	88	F	3		2	91	M	2
1	67	M	1		1	62	M	1		3	94	F	2		2	89	F	3
1	66	U	STG		1	77	M	2		3	112	M	3		2	85	U	STG
2	98	M	2		1	76	M	2		3	103	M	3		2	100	M	2
2	97	F	2		2	78	F	2		3	90	F	3		2	99	M	2
2	81	M	1		2	108	M	2		4	101	F	3		3	122	M	3
2	82	U	STG		2	74	M	2		4	102	F	3		4	104	M	2
2	86	U	STG		2	72	M	2		4	119	M	2		4	122	M	2
3	123	M	2		2	102	M	2		5	104	F	3		4	114	M	3
2	105	M	2		2	104	F	2		5	123	F	2		4	125	M	3
2	104	M	2		2	96	F	3		5	119	M	3		4	109	F	3
2	99	F	2		2	116	M	3		5	105	F	3		4	105	F	3
2	100	F	3		2	112	M	2		6	132	F	2		4	126	M	3
2	79	M	1		2	113	M	2		6	134	M	2		6	117	M	3
2	106	M	3		3	125	U	STG		6	120	M	3		6	133	M	3
2	89	M	2		3	106	M	3		6	119	M	2		6	132	M	3
2	96	M	3		3	90	F	3		6	120	M	2		6	117	M	3
2	95	M	3		3	123	M	2		7	120	M	2		7	122	M	3
2	92	F	3		6	126	M	3		7	120	F	2		8	126	M	3
2	94	M	2		7	143	U	STG		7	131	F	2		9	134	M	3
2	91	F	3		7	135	M	2		7	125	M	2		9	127	M	3
2	105	F	3		7	134	M	2		7	120	F	2		11	128	M	3
3	113	M	2		7	135	M	2		8	124	F	2		13	130	M	3
3	117	U	STG		8	132	M	2		9	124	U	STG
3	89	M	2
3	93	M	1
3	98	U	STG
3	89	M	2
3	113	M	3
3	108	F	3
3	114	M	2
3	104	M	2
3	96	F	2
3	102	U	STG
3	94	M	2
3	101	F	2
3	97	M	2
3	94	M	2
3	100	M	2
3	92	F	2
3	100	M	3
3	97	F	3
3	118	M	2
3	113	M	2
3	103	F	3
3	99	F	3
4	97	F	2
4	103	M	2
4	114	U	STG
4	123	M	3
4	118	M	3
4	106	F	3
4	115	M	2
4	114	U	STG
4	113	U	STG
4	120	M	2
4	126	M	2
4	97	F	3
4	101	F	2
4	102	F	3
4	107	F	3
4	99	F	3
4	102	F	2
4	108	F	3
4	104	F	2
4	106	F	3
4	109	F	3
4	101	F	2
4	114	M	3
4	105	F	3
4	130	M	2
4	124	M	2
4	112	M	2
4	120	M	2
4	110	M	2
5	120	M	3
5	114	M	2
5	127	M	2
5	116	M	2
5	114	M	2
5	113	F	2
5	106	M	2
5	99	F	2
5	111	F	2
5	119	F	2
5	124	M	2
5	123	M	2
5	104	F	3
6	95	F	3
6	132	M	2
6	119	M	2
6	134	M	2
6	126	M	2
6	126	M	2
6	118	M	2
6	116	U	STG
6	105	U	STG
6	123	F	2
6	122	F	2
6	122	F	3
6	115	F	2
7	109	F	2
7	106	F	2
7	107	M	2
7	120	M	3
7	130	M	2
7	123	U	STG
7	123	M	2
7	107	F	3
7	126	M	2
7	136	M	2
7	132	M	2
7	135	M	2
7	118	M	2
8	111	F	2
8	116	F	2
8	134	M	2
9	121	F	3
9	138	M	2
10	127	M	3

## Sheet: Parupeneus multifasciatus
Fished Reefs					Bani MPA					San Salvador MPA
Age (Years)	Standard Length (mm)	Sex	Gonad Stage		Age (Years)	Standard Length (mm)	Sex	Gonad Stage		Age (Years)	Standard Length (mm)	Sex	Gonad Stage
1	58	U	1		<1	42	U	1		<1	46	U	1
1	53	U	1		1	48	U	1		<1	45	U	1
2	60	U	1		1	46	U	1		1	47	U	1
2	56	U	1		1	45	U	1		1	45	U	1
2	53	U	1		3	83	F	1		1	48	U	1
2	68	U	1		3	79	F	1		3	74	M	1
2	65	F	1		3	74	M	1		4	84	F	1
2	55	U	1		3	83	U	STG		4	83	M	1
3	121	U	STG		3	75	M	1		5	85	M	1
3	96	F	2		5	134	M	2		6	118	F	1
3	61	U	1		6	107	F	3		6	115	F	2
3	90	U	STG		6	103	M	1		6	113	F	3
4	125	M	1		6	137	M	2		7	110	F	3
4	83	U	STG		6	105	U	STG		7	111	F	3
4	86	M	1		7	128	F	3		7	106	F	3
4	132	M	2		7	130	M	2		7	104	F	3
4	120	M	2		7	118	F	2		7	90	F	1
5	90	M	1		7	118	F	3		8	146	F	2
5	84	M	1		7	141	M	2		8	140	M	2
5	93	F	2		8	152	M	2		8	109	M	1
5	85	M	1		8	132	M	2		8	130	M	2
5	78	M	2		9	154	M	2		9	145	M	2
5	65	M	1		9	144	U	STG		9	153	F	2
5	133	F	1		9	112	F	3		9	115	F	3
5	100	U	STG		9	132	F	3		9	137	M	2
5	113	F	3		11	140	M	1		9	103	U	STG
6	109	F	3		12	153	M	2		10	145	F	2
6	111	U	STG		12	143	M	2		11	159	M	2
6	92	F	2							11	114	F	3
6	92	F	2							12	154	F	2
6	119	F	3							13	154	F	2
6	132	M	2							14	145	M	2
6	102	F	3							17	152	M	2
7	130	M	2
7	116	F	3
7	132	M	2
7	106	F	3
7	109	F	3
8	141	F	2
8	111	F	3
8	120	F	3
8	112	F	3
8	138	M	2
9	116	F	3
9	156	M	2
9	128	F	2
10	142	M	2
10	139	M	2
10	157	M	2
10	144	M	2
11	111	M	3
11	140	U	STG
14	115	M	3
15	121	F	3
18	126	F	3
