# Supplementary material for: Coral reef fishes exhibit beneficial phenotypes inside marine protected areas
Source: PLoS One. 2018 Feb 22;13(2):e0193426. doi: 10.1371/journal.pone.0193426 (PMC5823445; doi:10.1371/journal.pone.0193426)
Supplement: S1 Table — Fish are divided by gender (male [M] or female [F]) and by site. Individuals listed as unknown (U) either had their gonads significantly damaged during collection, or were juveniles, making gender identification unreliable. The term “T” denotes the total number of fish caught in any given category. (XLSX) [file pone.0193426.s002.xlsx]

## Sheet: S1 Table
	A. nigrofuscus				C. striatus				P. multifasciatus				All Species
MPA/ Fished Reef	M	F	U	T	M	F	U	T	M	F	U	T	M	F	U	T
Bani	15	12	12	39	28	7	3	38	13	8	7	28	56	27	22	105
San Salvador	16	14	5	35	20	17	1	38	11	16	6	33	47	47	12	106
Taklobo Farm	14	12	8	34	30	5	2	37	0	0	0	0	44	17	10	71
Fished Reef	35	38	25	98	71	44	19	134	20	21	14	55	126	103	58	287
Total	80	76	50	206	149	73	25	247	44	45	27	116	273	194	102	569
